# Supplementary material for: Claudin-1/4 as directly target gene of HIF-1α can feedback regulating HIF-1α by PI3K-AKT-mTOR and impact the proliferation of esophageal squamous cell though Rho GTPase and p-JNK pathway
Source: Springer Nature journal article supplement (doi:10.1038/s41417-021-00328-2), 2021-07-19
Supplement: MOESM2 [file 41417_2021_328_MOESM2_ESM.pdf]

This is an Open Access document downloaded from ORCA, Cardiff University's institutional repository: <https://orca.cardiff.ac.uk/id/eprint/143660/>

This is the author's version of a work that was submitted to / accepted for publication.

Citation for final published version:

Liu, Hong, Zhang, Zhancheng, Zhou, Shenli, Liu, Xianfang, Li, Guodong, Song, Bing and Xu, Wei 2022. Claudin-1/4 as directly target gene of HIF-1 $\alpha$  can feedback regulating HIF-1 $\alpha$  by PI3K-AKT-mTOR and impact the proliferation of esophageal squamous cell through Rho GTPase and p-JNK pathway. *Cancer Gene Therapy* 29 , pp. 665-682. 10.1038/s41417-021-00328-2

Publishers page: <https://doi.org/10.1038/s41417-021-00328-2>

Please note:

Changes made as a result of publishing processes such as copy-editing, formatting and page numbers may not be reflected in this version. For the definitive version of this publication, please refer to the published source. You are advised to consult the publisher's version if you wish to cite this paper.

This version is being made available in accordance with publisher policies. See <http://orca.cf.ac.uk/policies.html> for usage policies. Copyright and moral rights for publications made available in ORCA are retained by the copyright holders.

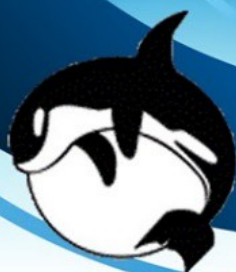

**Supplementary Fig. 1 The relevance of *CLDN1/CLDN4/HIF-1*  $\alpha$  with ESCC in TCGA database.**

**A,B,C** In ESCC, the expression of *CLDN1*(**A**),*CLDN4*(**B**) and HIF-1  $\alpha$  (**C**) in cancer tissues are significant higher than that in para-cancers. **D,E** The protein expression of *CLDN1* and HIF-1  $\alpha$  (**D**) and *CLDN4* and HIF-1  $\alpha$  (**E**) have significant correlation in ESCC .(\*,  $p < 0.05$ ; \*\*,  $p < 0.01$ ).
